# Supplementary material
Source: publisher figshare collection journal article supplement (https://acs.figshare.com/ndownloader/files/3963898)

# Efficient Determination of Accurate Force Fields for Porous Materials Using Ab-initio Total Energy Calculations – Supporting Information

Jihan Kim<sup>a</sup>, Li-Chiang Lin<sup>b</sup>, Kyuho Lee<sup>b,c</sup>, Jeffrey B. Neaton<sup>c</sup>, and Berend Smit<sup>b,d,e</sup>

<sup>a</sup> Department of Chemical and Biomolecular Engineering, Korea Advanced Institute of Science and Technology, 291 Daehak-ro Yuseong-gu, Daejeon, Korea 305-701; E-mail: [jihankim@kaist.ac.kr](mailto:jihankim@kaist.ac.kr)

<sup>b</sup> Department of Chemical and Biomolecular Engineering, University of California, Berkeley, California, 94720, USA.

<sup>c</sup> The Molecular Foundry, Lawrence Berkeley Laboratory, Berkeley, California, 94720, USA.

<sup>d</sup> Department of Chemistry, University of California, Berkeley, California, 94720, USA.

<sup>e</sup> Materials Sciences Division, Lawrence Berkeley National Laboratory, Berkeley, CA, 94720, USA.

## A. CO<sub>2</sub> in Mg-MOF-74 Stability Analysis

To test the robustness of our methodology, the  $E_{\text{reference, binding}}$  values derived from the MP2-derived force field were varied from  $-4$  to  $+4$  kJ/mol in steps of 1 kJ/mol. As a result, the varying shift values to  $E_{\text{reference, binding}}$  causes changes in the final  $K_H$  value. In particular, the CO<sub>2</sub>  $K_H$  is computed for each of the different shifts and the result is summarized in Figure S11(a). As can be seen from Figure S11(a), the CO<sub>2</sub>  $K_H$  changes from  $3.30 \times 10^{-5}$  mol/kg/Pa (at  $E_{\text{binding}} = -42.22$  kJ/mol) to  $3.25 \times 10^{-3}$  mol/kg/Pa (at  $E_{\text{binding}} = -50.22$  kJ/mol). This stability analysis illustrates the importance of obtaining accurate quantum mechanical binding energies for this system.

To extend this analysis beyond the Henry coefficient calculations, which only sheds insights on the adsorption property at infinite dilution conditions, we compute the corresponding CO<sub>2</sub> adsorption isotherms at  $E_{\text{binding}} = E_0 - 4$ ,  $E_0 - 2$ ,  $E_0$  (reference),  $E_0 + 2$ , and  $E_0 + 4$  kJ/mol, where  $E_0 = -46.22$  kJ/mol, up to 1 bar and compare the results with the MP2-derived force field data at  $T = 313$  K. The results are summarized in Figure S11(b). In all cases, the parameters for the CO<sub>2</sub> – CO<sub>2</sub> interactions were kept the same.

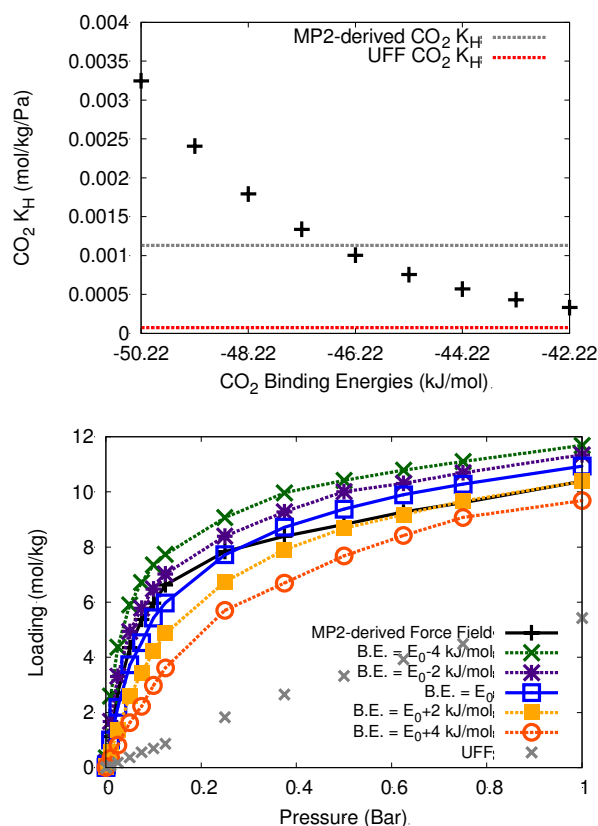

Figure S1(a) Computed CO<sub>2</sub>  $K_H$  as a function of the CO<sub>2</sub> binding energy in Mg-MOF-74 at  $T = 313$  K. The binding energy values were changed from  $E_{\text{binding}} = E_0 - 4$  to  $E_0 + 4$  kJ/mol, with  $E_0 = -46.22$  kJ/mol representing the accurate, original binding energy value. (b) The simulated adsorption isotherm curves for  $E_{\text{binding}} = E_0 - 4$  to  $E_0 + 4$  kJ/mol, with  $E_0 = -46.22$  kJ/mol.

## B. CH<sub>4</sub> Single Point Energy Distributions for Eight Zeolites

MFI

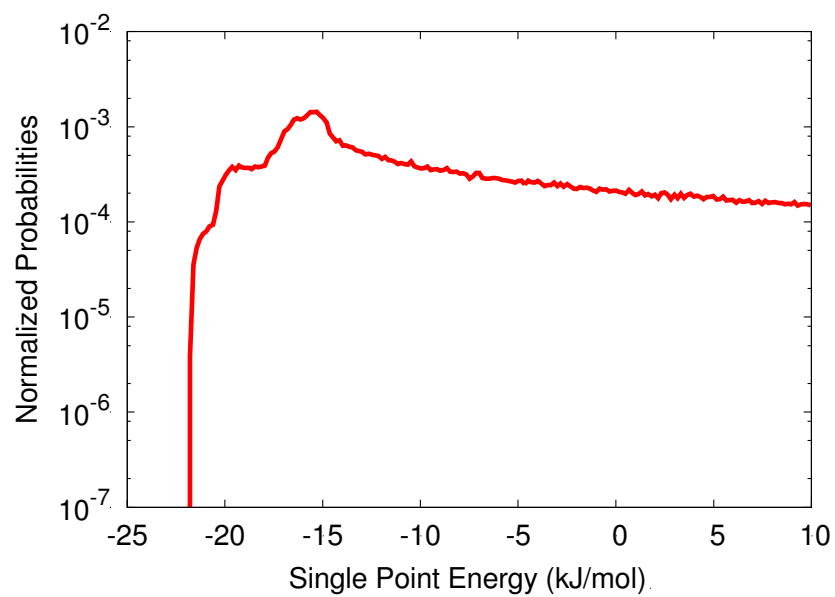

LTA

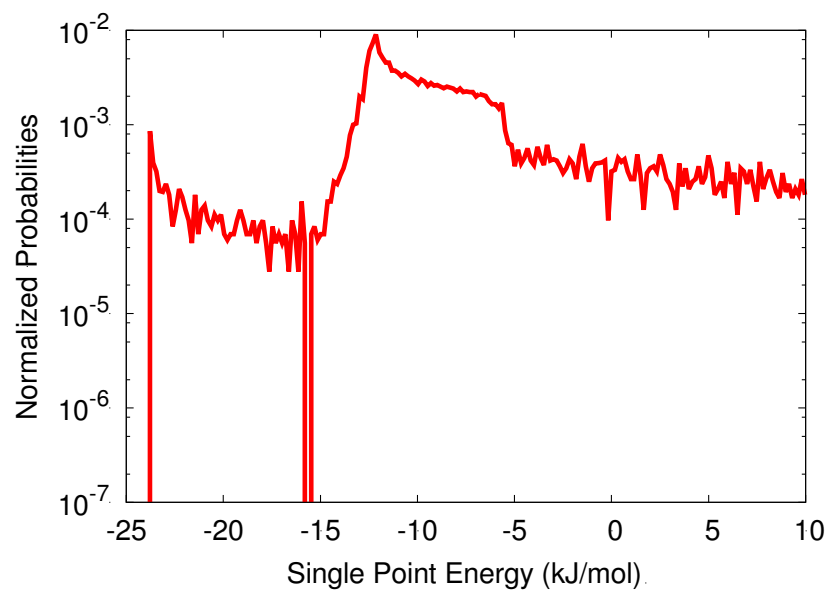

WEI

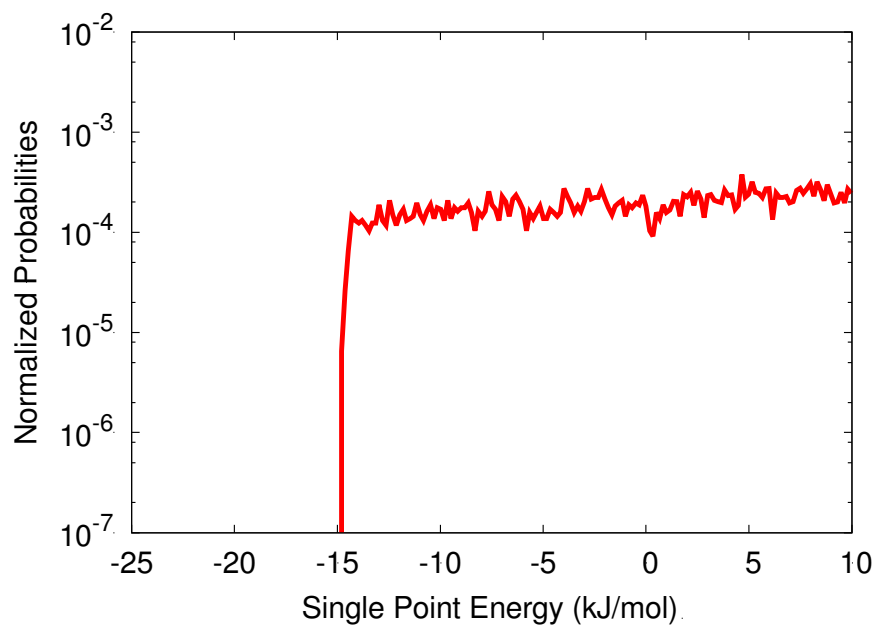

RHO

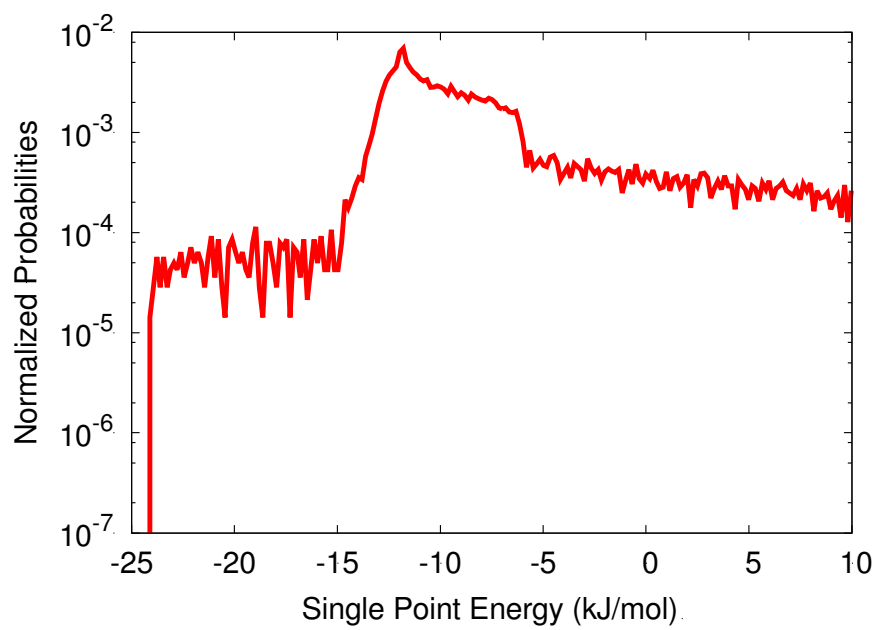

SOD

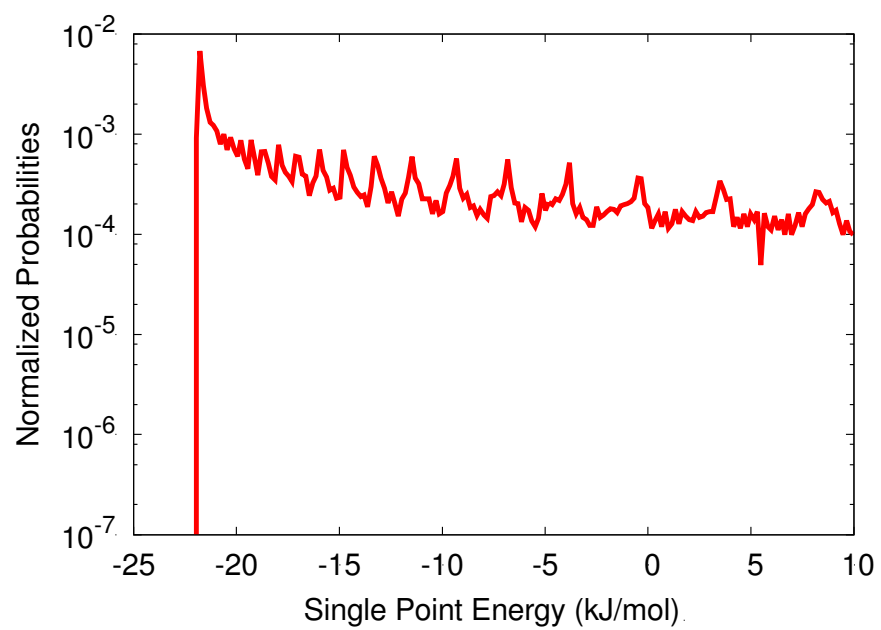

FAU

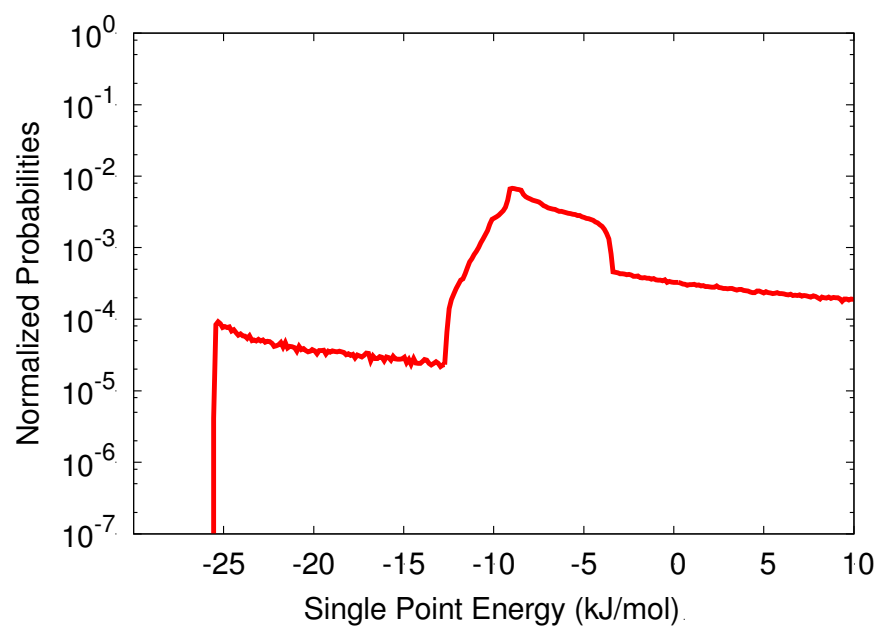

RWY

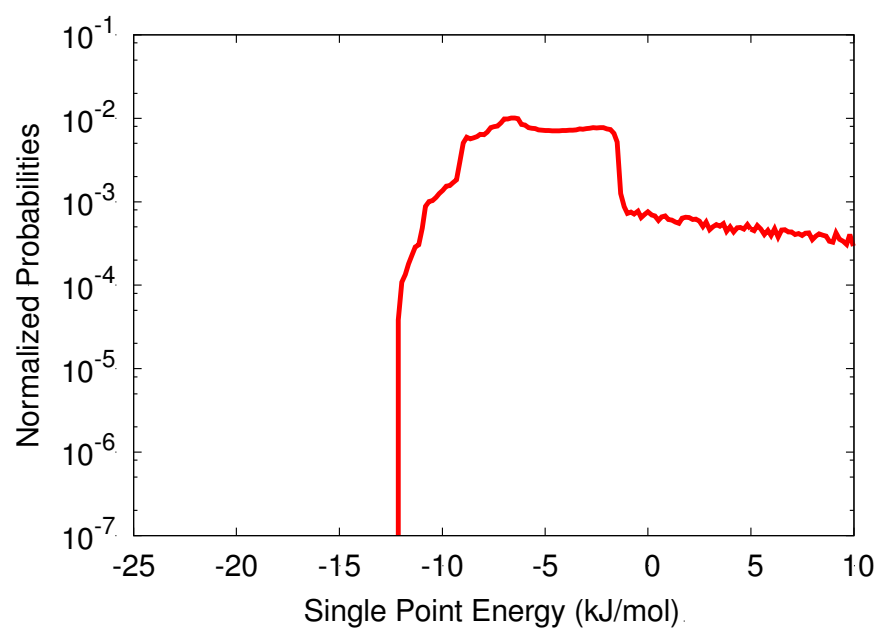

ABW

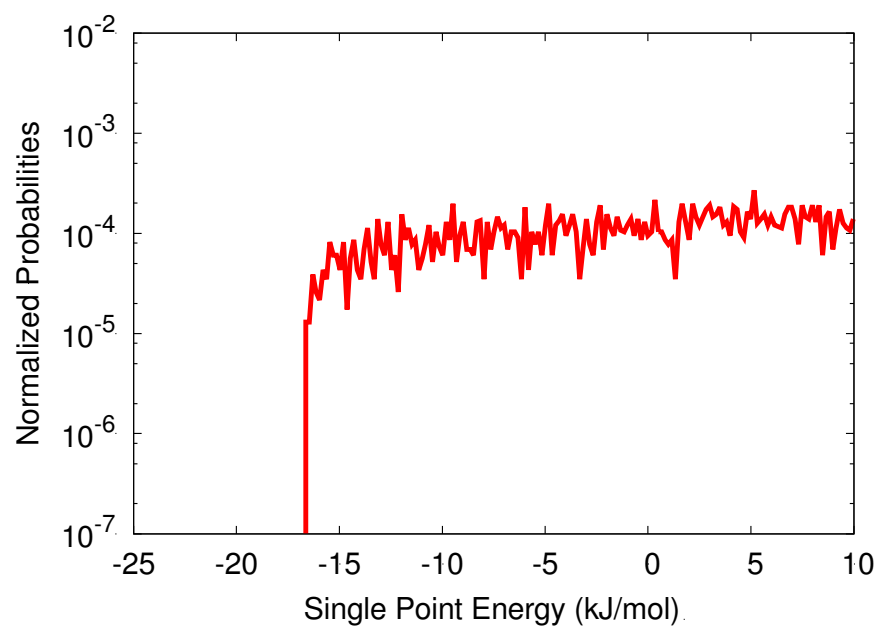

Supplement: Supplementary file 1 [file 3963898]
